## Retraction

# Retraction: Large intergenic non-coding RNA-ROR reverses gemcitabine-induced autophagy and apoptosis in breast cancer cells

Yao-Min Chen<sup>1</sup>, Yu Liu<sup>1</sup>, Hai-Yan Wei<sup>1</sup>, Ke-Zhen Lv<sup>1</sup> and Pei-Fen Fu<sup>1</sup>

<sup>1</sup>Department of Breast Surgery, The First Affiliated Hospital of Zhejiang University, Hangzhou 310000, P.R. China

Published: December 31, 2025

**Copyright:** © 2025 Chen et al. This is an open access article distributed under the terms of the [Creative Commons Attribution License](#) (CC BY 4.0), which permits unrestricted use, distribution, and reproduction in any medium, provided the original author and source are credited.

**This article has been retracted:** Oncotarget has completed its investigation of this article and found several image duplications. Specifically, Figure 3A contains a scatter plot also used in the earlier published paper Figure 4 [1], which has since been retracted. This plot also appears in Figures of [2, 3], published concurrently, both of which have also been retracted. And the same plots appeared in later published papers [4–8]. We also found internal duplication in Figure 7B, where TEM ultrastructure image of MDA-MB-231 cells treated with “Gem” is highly similar to the image for cells treated with “shCtrl+Gem” and identical to the image of Gem-treated cells in Figure 2B. Additionally, the fluorescent image for cells treated with “Gem” in Figure 2A overlaps with the “Blank” image in Figure 7A and two other images in Figure 7A (shCtrl+Gem and shROR+Gem) also overlap. In light of these findings, the Editorial decision was made to retract this paper.

Oncotarget has contacted both the authors and members of the faculty of their institution (The First Affiliated Hospital of Zhejiang University, Hangzhou, China), regarding these issues, but we have received no response to date.

Original article: Oncotarget. 2016; 7:59604–59617. <https://doi.org/10.18632/oncotarget.10730>

## REFERENCES

1. Li X, Chen L, Wang W, Meng FB, Zhao RT, Chen Y. MicroRNA-150 Inhibits Cell Invasion and Migration and Is Downregulated in Human Osteosarcoma. *Cytogenet Genome Res.* 2015; 146:124–35. <https://doi.org/10.1159/000437379>. [PubMed]. Retraction in: *Cytogenet Genome Res.* 2022; 162:95. <https://doi.org/10.1159/000523671>. [PubMed]
2. Song CL, Liu B, Diao HY, Shi YF, Zhang JC, Li YX, Liu N, Yu YP, Wang G, Wang JP, Li Q. Down-regulation of microRNA-320 suppresses cardiomyocyte apoptosis and protects against myocardial ischemia and reperfusion injury by targeting IGF-1. *Oncotarget.* 2016; 7:39740–57. <https://doi.org/10.18632/oncotarget.9240>. [PubMed]. Retraction in: *Oncotarget.* 2025; 16:167. <https://doi.org/10.18632/oncotarget.28704>. [PubMed]
3. Li YG, Liang NX, Qin YZ, Ma DJ, Huang CJ, Liu L, Li SQ. Effects of RNAi-mediated TUSC3 silencing on radiation-induced autophagy and radiation sensitivity of human lung adenocarcinoma cell line A549 under hypoxic condition. *Tumour Biol.* 2016; 37:16357–65. <https://doi.org/10.1007/s13277-016-5458-3>. [PubMed]. Retraction in: *Tumour Biol.* 2021; 43:351–54. <https://doi.org/10.3233/TUB-219010>. [PubMed]
4. Xi L, Zhang Y, Kong S, Liang W. *miR-34* inhibits growth and promotes apoptosis of osteosarcoma in nude mice through targetly regulating TGIF2 expression. *Biosci Rep.* 2018; 38:BSR20180078. <https://doi.org/10.1042/BSR20180078>. [PubMed]. Retraction in: *Biosci Rep.* 2024; 44:BSR-2018–0078\_RET. [https://doi.org/10.1042/BSR-2018-0078\\_RET](https://doi.org/10.1042/BSR-2018-0078_RET). [PubMed]
5. Dai J, Wei W. Influence of the RPL34 gene on the growth and metastasis of oral squamous cell carcinoma cells. *Arch Oral Biol.* 2017; 83:40–46. <https://doi.org/10.1016/j.archoralbio.2017.06.035>. [PubMed]
6. Chen J, Jia YS, Liu GZ, Sun Q, Zhang F, Ma S, Wang YJ. Role of LncRNA TUG1 in intervertebral disc degeneration and nucleus pulposus cells via regulating Wnt/ $\beta$ -catenin signaling pathway. *Biochem Biophys Res Commun.* 2017; 491:668–74. <https://doi.org/10.1016/j.bbrc.2017.07.146>. [PubMed]

7. Gao GY, Ma J, Lu P, Jiang X, Chang C. RETRACTED: Ophiopogonin B induces the autophagy and apoptosis of colon cancer cells by activating JNK/c-Jun signaling pathway. *Biomed Pharmacother.* 2018; 108:1208–15. <https://doi.org/10.1016/j.biopha.2018.06.172>. [PubMed]. Retraction in: *Biomed Pharmacother.* 2023; 163:114768. <https://doi.org/10.1016/j.biopha.2023.114768>. [PubMed]
8. Wang L, Liu LF, Zhou L, Liao F, Wang J. Effects of ebv-miR-BART7 on tumorigenicity, metastasis, and TRAIL sensitivity of non-small cell lung cancer. *J Cell Biochem.* 2019; 120:10057–68. <https://doi.org/10.1002/jcb.28289>. [PubMed]. Retraction in: *J Cell Biochem.* 2021 (Suppl 1); 122:S125. <https://doi.org/10.1002/jcb.30105>. [PubMed]
